# Supplementary material for: Levels of Mercury, Methylmercury and Selenium in Fish: Insights into Children Food Safety
Source: PubMed Central journal article supplement (PMC7923435; doi:10.3390/toxics9020039), 2021-02-20
Supplement: toxics-09-00039-s001.pdf [file toxics-09-00039-s001.pdf]

## Article

# Supplementary Materials: Levels of Mercury, Methylmercury and Selenium in Fish: Insights into Children Food Safety

Grazia Barone, Arianna Storelli, Daniela Meleleo, Angela Dambrosio, Rita Garofalo, Antonio Busco and Maria Maddalena Storelli

**Table S1.** THg and MeHg concentrations and daily (CR<sub>lim</sub>) and monthly (CR<sub>mm</sub>) consumption rate limit in children.

| Species               | THg                     |                                        |                                | MeHg                    |                                        |                                |
|-----------------------|-------------------------|----------------------------------------|--------------------------------|-------------------------|----------------------------------------|--------------------------------|
|                       | µg g <sup>-1</sup> w.w. | CR <sub>lim</sub> (g d <sup>-1</sup> ) | CR <sub>mm</sub> (meals/month) | µg g <sup>-1</sup> w.w. | CR <sub>lim</sub> (g d <sup>-1</sup> ) | CR <sub>mm</sub> (meals/month) |
| European anchovy      | 0.03                    | 87                                     | 23                             | 0.02                    | 131                                    | 35                             |
| European pilchard     | 0.05                    | 52                                     | 14                             | 0.04                    | 66                                     | 18                             |
| European hake         | 0.08                    | 33                                     | 9                              | 0.06                    | 44                                     | 12                             |
| Gilthead seabream     | 0.15                    | 17                                     | 5                              | 0.13                    | 20                                     | 5                              |
| European seabass      | 0.13                    | 20                                     | 5                              | 0.11                    | 24                                     | 6                              |
| Atlantic mackerel     | 0.18                    | 15                                     | 4                              | 0.14                    | 19                                     | 5                              |
| Chub mackerel         | 0.21                    | 12                                     | 3                              | 0.19                    | 14                                     | 4                              |
| Atlantic bonito       | 0.28                    | 9                                      | 3                              | 0.26                    | 10                                     | 3                              |
| Albacore              | 0.43                    | 6                                      | 2                              | 0.38                    | 7                                      | 2                              |
| Atlantic bluefin tuna | 0.51                    | 5                                      | 1                              | 0.47                    | 6                                      | 1                              |
| Swordfish             | 0.64                    | 4                                      | 1                              | 0.55                    | 5                                      | 1                              |
| Sandy ray             | 0.38                    | 7                                      | 2                              | 0.35                    | 7                                      | 2                              |
| Longnosed skate       | 0.33                    | 8                                      | 2                              | 0.30                    | 9                                      | 2                              |
| Shagreen ray          | 0.30                    | 9                                      | 2                              | 0.27                    | 10                                     | 3                              |
| Turbot                | 0.24                    | 11                                     | 3                              | 0.20                    | 13                                     | 4                              |
| Common sole           | 0.18                    | 15                                     | 4                              | 0.16                    | 16                                     | 4                              |
| European anchovy      | 0.03                    | 87                                     | 23                             | 0.02                    | 131                                    | 35                             |
| European pilchard     | 0.05                    | 52                                     | 14                             | 0.04                    | 66                                     | 18                             |
| European hake         | 0.08                    | 33                                     | 9                              | 0.06                    | 44                                     | 12                             |
| Gilthead seabream     | 0.15                    | 17                                     | 5                              | 0.13                    | 20                                     | 5                              |
| European seabass      | 0.13                    | 20                                     | 5                              | 0.11                    | 24                                     | 6                              |
| Atlantic mackerel     | 0.18                    | 15                                     | 4                              | 0.14                    | 19                                     | 5                              |
| Chub mackerel         | 0.21                    | 12                                     | 3                              | 0.19                    | 14                                     | 4                              |
